# Supplementary material for: Dynamics and interactions of cobalamin and folate status during advanced aging – a longitudinal study in a community-dwelling cohort with multiple follow-ups
Source: PubMed Central journal article supplement (PMC7333253; doi:10.1186/s12937-020-00576-2), 2020-07-02
Supplement: 12937_2020_576_MOESM2_ESM.pdf [file 12937_2020_576_MOESM2_ESM.pdf]

## Dynamics and interactions of cobalamin and folate status during advanced aging – a longitudinal study in a community-dwelling cohort with multiple follow-ups

Alexandra Jungert, Carola Zenke-Philippi, Monika Neuhäuser-Berthold – Nutrition Journal

1

**Supplementary Table 1** Predictors of serum cobalamin using linear mixed-effects models with BMI, relative FFM and absolute FM as main effects ( $n = 332$ )<sup>a</sup>

|                                         | Model with BMI (kg/m <sup>2</sup> ) |                       | Model with FFM (%)      |                       | Model with FM (kg)      |                       |
|-----------------------------------------|-------------------------------------|-----------------------|-------------------------|-----------------------|-------------------------|-----------------------|
|                                         | PE [95% CI]                         | <i>P</i> <sup>b</sup> | PE [95% CI]             | <i>P</i> <sup>b</sup> | PE [95% CI]             | <i>P</i> <sup>b</sup> |
| Intercept                               | 325.97 [289.87, 362.06]             | <0.001                | 318.96 [280.10, 357.83] | <0.001                | 325.09 [288.80, 361.39] | <0.001                |
| Serum folate (nmol/L)                   | 3.54 [2.04, 5.03]                   | <0.001                | 3.57 [2.08, 5.07]       | <0.001                | 3.56 [2.06, 5.05]       | <0.001                |
| Vitamin B/multi-vitamin supplementation | 96.41 [50.23, 142.59]               | <0.001                | 96.64 [50.48, 142.81]   | <0.001                | 96.42 [50.24, 142.60]   | <0.001                |
| Age (years)                             | 2.55 [-1.82, 6.91]                  | 0.980                 | 2.67 [-1.68, 7.02]      | 0.968                 | 2.68 [-1.69, 7.04]      | 0.970                 |
| Cobalamin intake (µg/d)                 | 2.10 [-4.31, 8.52]                  | 1.000                 | 1.97 [-4.43, 8.38]      | 1.000                 | 2.00 [-4.41, 8.41]      | 1.000                 |
| Folate intake (µg/d)                    | -0.11 [-0.33, 0.12]                 | 0.998                 | -0.10 [-0.33, 0.13]     | 0.999                 | -0.10 [-0.33, 0.13]     | 0.998                 |
| Alcohol intake (g/d)                    | -0.78 [-2.80, 1.24]                 | 1.000                 | -0.72 [-2.73, 1.29]     | 1.000                 | -0.74 [-2.76, 1.27]     | 1.000                 |
| Past/current smoking                    | 5.11 [-49.51, 59.72]                | 1.000                 | 4.59 [-49.93, 59.11]    | 1.000                 | 4.75 [-49.83, 59.33]    | 1.000                 |
| Male sex                                | -24.85 [-87.14, 37.43]              | 1.000                 | -2.36 [-80.31, 75.58]   | 1.000                 | -22.04 [-85.78, 41.70]  | 1.000                 |
| Age x serum folate                      | 0.38 [0.22, 0.54]                   | <0.001                | 0.38 [0.22, 0.54]       | <0.001                | 0.38 [0.22, 0.54]       | <0.001                |
| Age x supplementation                   | 4.10 [-2.48, 10.69]                 | 0.966                 | 3.98 [-2.59, 10.56]     | 0.971                 | 4.03 [-2.55, 10.61]     | 0.971                 |
| Age x cobalamin intake                  | -0.49 [-1.16, 0.18]                 | 0.891                 | -0.48 [-1.15, 0.18]     | 0.893                 | -0.48 [-1.15, 0.18]     | 0.899                 |
| Age x sex                               | 0.13 [-7.21, 7.46]                  | 1.000                 | -0.03 [-7.36, 7.30]     | 1.000                 | 0.03 [-7.31, 7.37]      | 1.000                 |
| Sex x serum folate                      | 7.55 [4.92, 10.18]                  | <0.001                | 7.54 [4.91, 10.17]      | <0.001                | 7.54 [4.91, 10.17]      | <0.001                |
| BMI (kg/m <sup>2</sup> )                | -0.57 [-6.19, 5.06]                 | 1.000                 |                         |                       |                         |                       |
| FFM (%)                                 |                                     |                       | -1.91 [-5.90, 2.07]     | 0.997                 |                         |                       |
| FM (kg)                                 |                                     |                       |                         |                       | 0.56 [-2.13, 3.25]      | 1.000                 |
| Model fit <sup>c</sup>                  | 0.705                               |                       | 0.704                   |                       | 0.705                   |                       |
| Residual standard deviation             | 312.13                              |                       | 312.08                  |                       | 312.13                  |                       |
| AIC                                     | 22,562                              |                       | 22,561                  |                       | 22,563                  |                       |

PE Parameter estimate, 95% CI 95% confidence interval, BMI body mass index, FFM fat-free mass, FM fat mass; AIC Akaike's information criterion

## **Dynamics and interactions of cobalamin and folate status during advanced aging – a longitudinal study in a community-dwelling cohort with multiple follow-ups**

Alexandra Jungert, Carola Zenke-Philippi, Monika Neuhäuser-Berthold – Nutrition Journal

2

<sup>a</sup> Linear mixed-effects models including serum cobalamin concentrations as dependent variable, random effects of age and subject and centered metric independent variables. The model based on the initial model 2, which considered as fixed effects: serum folate, vitamin B/multi-vitamin supplementation, age, cobalamin intake, folate intake, alcohol intake, smoking, sex and effect modifications by sex and age. For this sub analysis, the initially included absolute FFM was replaced by BMI, relative FFM and absolute FM, respectively.

<sup>b</sup> Denotes *P* values after adjusting for simultaneous inference

<sup>c</sup> Correlation between observed and predicted serum cobalamin concentrations

**Supplementary Table 2** Predictors of serum folate using linear mixed-effects models with BMI, relative FFM and absolute FM as main effects ( $n = 332$ )<sup>a</sup>

|                                         | Model with BMI (kg/m <sup>2</sup> ) |                       | Model with FFM (%)    |                       | Model with FM (kg)    |                       |
|-----------------------------------------|-------------------------------------|-----------------------|-----------------------|-----------------------|-----------------------|-----------------------|
|                                         | PE [95% CI]                         | <i>P</i> <sup>b</sup> | PE [95% CI]           | <i>P</i> <sup>b</sup> | PE [95% CI]           | <i>P</i> <sup>b</sup> |
| Intercept                               | 22.88 [21.54, 24.22]                | <0.001                | 23.40 [21.95, 24.85]  | <0.001                | 22.99 [21.64, 24.34]  | <0.001                |
| Serum cobalamin (pmol/L)                | 0.006 [0.003, 0.008]                | <0.001                | 0.006 [0.003, 0.008]  | <0.001                | 0.006 [0.003, 0.008]  | <0.001                |
| Vitamin B/multi-vitamin supplementation | 6.49 [4.77, 8.21]                   | <0.001                | 6.47 [4.75, 8.18]     | <0.001                | 6.49 [4.77, 8.21]     | <0.001                |
| Age (years)                             | 0.21 [0.04, 0.38]                   | 0.221                 | 0.22 [0.05, 0.39]     | 0.171                 | 0.21 [0.04, 0.38]     | 0.222                 |
| Cobalamin intake (µg/d)                 | -0.16 [-0.40, 0.08]                 | 0.952                 | -0.16 [-0.40, 0.08]   | 0.933                 | -0.16 [-0.40, 0.08]   | 0.942                 |
| Folate intake (µg/d)                    | 0.02 [0.01, 0.03]                   | 0.001                 | 0.02 [0.01, 0.03]     | 0.001                 | 0.02 [0.01, 0.03]     | 0.001                 |
| Alcohol intake (g/d)                    | <0.01 [-0.08, 0.08]                 | 1.000                 | 0.01 [-0.07, 0.09]    | 1.000                 | 0.01 [-0.07, 0.09]    | 1.000                 |
| Past/current smoking                    | -1.16 [-3.27, 0.95]                 | 0.989                 | -1.09 [-3.21, 1.02]   | 0.993                 | -1.08 [-3.19, 1.04]   | 0.994                 |
| Male sex                                | -0.98 [-3.28, 1.33]                 | 0.999                 | -2.73 [-5.68, 0.21]   | 0.614                 | -1.45 [-3.82, 0.92]   | 0.971                 |
| Age x serum cobalamin                   | <0.01 [>-0.01, <0.01]               | 0.934                 | <0.01 [>-0.01, <0.01] | 0.930                 | <0.01 [>-0.01, <0.01] | 0.932                 |
| Age x supplementation                   | 0.26 [0.01, 0.50]                   | 0.447                 | 0.25 [<0.01, 0.50]    | 0.476                 | 0.25 [<0.01, 0.50]    | 0.479                 |
| Age x folate intake                     | 0.01 [>-0.01, <0.01]                | 0.966                 | <0.01 [>-0.01, <0.01] | 0.970                 | <0.01 [>-0.01, <0.01] | 0.970                 |
| Age x sex                               | -0.10 [-0.39, 0.19]                 | 1.000                 | -0.10 [-0.39, 0.19]   | 1.000                 | -0.10 [-0.39, 0.19]   | 1.000                 |
| Sex x serum cobalamin                   | 0.01 [0.01, 0.02]                   | <0.001                | 0.01 [0.01, 0.02]     | <0.001                | 0.01 [0.01, 0.02]     | <0.001                |
| BMI (kg/m <sup>2</sup> )                | -0.23 [-0.45, -0.01]                | 0.441                 |                       |                       |                       |                       |
| FFM (%)                                 |                                     |                       | 0.15 [-0.01, 0.30]    | 0.572                 |                       |                       |
| FM (kg)                                 |                                     |                       |                       |                       | -0.09 [-0.20, 0.02]   | 0.757                 |
| Model fit <sup>c</sup>                  | 0.613                               |                       | 0.617                 |                       | 0.617                 |                       |
| Residual standard deviation             | 13.34                               |                       | 13.31                 |                       | 13.32                 |                       |
| AIC                                     | 12,531                              |                       | 12,533                |                       | 12,534                |                       |

PE Parameter estimate, 95% CI 95% confidence interval, BMI body mass index, FFM fat-free mass, FM fat mass, AIC Akaike's information criterion

## **Dynamics and interactions of cobalamin and folate status during advanced aging – a longitudinal study in a community-dwelling cohort with multiple follow-ups**

Alexandra Jungert, Carola Zenke-Philippi, Monika Neuhäuser-Berthold – Nutrition Journal

4

<sup>a</sup> Linear mixed-effects models including serum folate concentrations as dependent variable, random effects of age and subject and centered metric independent variables. The model based on the initial model 2, which considered as fixed effects: serum cobalamin, vitamin B/multi-vitamin supplementation, age, folate intake, cobalamin intake, alcohol intake, smoking, sex and effect modifications by sex and age. For this sub analysis, the initially included absolute FFM was replaced by BMI, relative FFM and absolute FM, respectively.

<sup>b</sup> Denotes *P* values after adjusting for simultaneous inference

<sup>c</sup> Correlation between observed and predicted serum folate concentrations

**Supplementary Table 3** Predictors of logarithmically transformed serum cobalamin using linear mixed-effects models without subjects with lifetime diagnosis of cancer/inflammatory bowel disease and records with serum cobalamin > 1000 pmol/L or with outlying residuals <sup>a</sup>

|                                            | Model 2 with total sample<br>( <i>n</i> = 237) |                       | Model 3 with serum creatinine<br>( <i>n</i> = 144) |                       | Model 4 without users of vitamin B/multi-<br>vitamin supplements ( <i>n</i> = 121) |                       |
|--------------------------------------------|------------------------------------------------|-----------------------|----------------------------------------------------|-----------------------|------------------------------------------------------------------------------------|-----------------------|
|                                            | PE [95% CI]                                    | <i>P</i> <sup>b</sup> | PE [95% CI]                                        | <i>P</i> <sup>b</sup> | PE [95% CI]                                                                        | <i>P</i> <sup>b</sup> |
| Intercept                                  | 2.4E+00 [2.4E+00, 2.5E+00]                     | <0.001                | 2.4E+00 [2.4E+00, 2.4E+00]                         | <0.001                | 2.4E+00 [2.3E+00, 2.4E+00]                                                         | <0.001                |
| Serum folate (nmol/L)                      | 4.4E-03 [3.6E-03, 5.2E-03]                     | <0.001                | 3.8E-03 [2.8E-03, 4.8E-03]                         | <0.001                | 4.3E-03 [3.0E-03, 5.6E-03]                                                         | <0.001                |
| Vitamin B/multi-vitamin<br>supplementation | 2.4E-02 [5.8E-04, 4.8E-02]                     | 0.459                 | 3.3E-02 [-2.1E-03, 6.8E-02]                        | 0.614                 |                                                                                    |                       |
| Age (years)                                | -6.5E-04 [-2.7E-03, 1.4E-03]                   | 1.000                 | 2.1E-03 [-1.4E-03, 5.7E-03]                        | 0.979                 | -1.4E-04 [-4.0E-03, 3.7E-03]                                                       | 1.000                 |
| Fat-free mass (kg)                         | -2.5E-03 [-6.6E-03, 1.5E-03]                   | 0.962                 | -3.7E-03 [-8.8E-03, 1.4E-03]                       | 0.905                 | -3.6E-03 [-9.0E-03, 1.9E-03]                                                       | 0.930                 |
| Cobalamin intake (µg/d)                    | 4.5E-03 [1.1E-03, 8.0E-03]                     | 0.132                 | 3.6E-03 [-6.1E-04, 7.8E-03]                        | 0.747                 | 1.8E-03 [-2.8E-03, 6.4E-03]                                                        | 0.999                 |
| Folate intake (µg/d)                       | -4.9E-05 [-1.7E-04, 7.1E-05]                   | 0.999                 | -6.7E-05 [-2.3E-04, 9.9E-05]                       | 1.000                 | -1.8E-05 [-2.1E-04, 1.8E-04]                                                       | 1.000                 |
| Alcohol intake (g/d)                       | -9.6E-05 [-1.4E-03, 1.2E-03]                   | 1.000                 | 1.6E-04 [-1.7E-03, 2.0E-03]                        | 1.000                 | 3.8E-05 [-1.8E-03, 1.9E-03]                                                        | 1.000                 |
| Past/current smoking                       | 1.6E-03 [-4.5E-02, 4.8E-02]                    | 1.000                 | 2.6E-03 [-5.5E-02, 6.0E-02]                        | 1.000                 | -1.0E-02 [-7.5E-02, 5.4E-02]                                                       | 1.000                 |
| Male sex                                   | -1.4E-02 [-9.7E-02, 6.9E-02]                   | 1.000                 | 7.9E-03 [-1.0E-01, 1.2E-01]                        | 1.000                 | 2.8E-02 [-8.9E-02, 1.5E-01]                                                        | 1.000                 |
| Age x serum folate                         | -1.2E-04 [-2.2E-04, -1.4E-05]                  | 0.300                 | -9.8E-05 [-2.3E-04, 3.6E-05]                       | 0.901                 | -1.3E-04 [-2.9E-04, 3.2E-05]                                                       | 0.776                 |
| Age x supplementation                      | 2.5E-03 [-8.7E-04, 5.8E-03]                    | 0.877                 | -1.8E-04 [-5.5E-03, 5.2E-03]                       | 1.000                 |                                                                                    |                       |
| Age x cobalamin intake                     | -3.1E-04 [-6.3E-04, 7.2E-06]                   | 0.534                 | -2.4E-04 [-6.9E-04, 2.0E-04]                       | 0.990                 | -6.2E-04 [-1.1E-03, -1.0E-04]                                                      | 0.206                 |
| Age x sex                                  | -2.3E-03 [-5.8E-03, 1.2E-03]                   | 0.947                 | -5.4E-03 [-1.2E-02, 8.4E-04]                       | 0.732                 | -1.3E-03 [-8.2E-03, 5.6E-03]                                                       | 1.000                 |
| Sex x serum folate                         | 2.6E-03 [1.0E-03, 4.2E-03]                     | 0.016                 | 9.7E-04 [-6.5E-04, 2.6E-03]                        | 0.979                 | 5.4E-04 [-1.4E-03, 2.5E-03]                                                        | 1.000                 |
| Serum creatinine (mg/dL)                   |                                                |                       | 4.0E-02 [-3.5E-02, 1.2E-01]                        | 0.992                 | 2.8E-02 [-5.3E-02, 1.1E-01]                                                        | 1.000                 |
| Model fit <sup>c</sup>                     | 0.886                                          |                       | 0.915                                              |                       | 0.916                                                                              |                       |
| Residual standard deviation                | 0.114                                          |                       | 0.104                                              |                       | 0.101                                                                              |                       |
| AIC                                        | -904                                           |                       | -428                                               |                       | -348                                                                               |                       |

## Dynamics and interactions of cobalamin and folate status during advanced aging – a longitudinal study in a community-dwelling cohort with multiple follow-ups

Alexandra Jungert, Carola Zenke-Philippi, Monika Neuhäuser-Berthold – Nutrition Journal

6

*PE* Parameter estimate, *95% CI* 95% confidence interval, *AIC* Akaike's information criterion

<sup>a</sup> Data represent the results of the linear mixed-effects models including logarithmically transformed ( $\log_{10}$ ) serum cobalamin concentrations as dependent variable, random effects of age and subject and centered metric independent variables. Model 2 considered as fixed effects: serum folate, vitamin B/multi-vitamin supplementation, age, absolute fat-free mass, cobalamin intake, folate intake, alcohol intake, smoking, sex and effect modifications by sex and age. Model 3 based on model 2 and considered serum creatinine as additional fixed effect. Model 4 based on model 3 but excluded records, in which use of vitamin B/multi-vitamin supplements was reported.

<sup>b</sup> Denotes *P* values after adjusting for simultaneous inference

<sup>c</sup> Correlation between observed and predicted  $\log_{10}$  serum cobalamin concentrations

**Supplementary Table 4** Predictors of logarithmically transformed serum folate using linear mixed-effects models without subjects with lifetime diagnosis of cancer/inflammatory bowel disease and records with serum cobalamin > 1000 pmol/L or with outlying residuals <sup>a</sup>

|                                            | Model 2 with total sample<br>( <i>n</i> = 235) |                       | Model 3 with serum creatinine<br>( <i>n</i> = 145) |                       | Model 4 without users of vitamin B/multi-vitamin<br>supplements ( <i>n</i> = 122) |                       |
|--------------------------------------------|------------------------------------------------|-----------------------|----------------------------------------------------|-----------------------|-----------------------------------------------------------------------------------|-----------------------|
|                                            | PE [95% CI]                                    | <i>P</i> <sup>b</sup> | PE [95% CI]                                        | <i>P</i> <sup>b</sup> | PE [95% CI]                                                                       | <i>P</i> <sup>b</sup> |
| Intercept                                  | 1.3E+00 [1.2E+00, 1.3E+00]                     | <0.001                | 1.3E+00 [1.2E+00, 1.3E+00]                         | <0.001                | 1.3E+00 [1.2E+00, 1.3E+00]                                                        | <0.001                |
| Serum cobalamin (pmol/L)                   | 5.3E-04 [4.3E-04, 6.3E-04]                     | <0.001                | 6.1E-04 [4.7E-04, 7.6E-04]                         | <0.001                | 6.4E-04 [4.7E-04, 8.2E-04]                                                        | <0.001                |
| Vitamin B/multi-vitamin<br>supplementation | 8.3E-02 [5.5E-02, 1.1E-01]                     | <0.001                | 1.1E-01 [6.4E-02, 1.5E-01]                         | <0.001                |                                                                                   |                       |
| Age (years)                                | 1.2E-03 [-1.2E-03, 3.5E-03]                    | 0.995                 | 6.8E-04 [-3.0E-03, 4.4E-03]                        | 1.000                 | 1.7E-03 [-2.4E-03, 5.8E-03]                                                       | 0.998                 |
| Fat-free mass (kg)                         | -1.3E-03 [-5.3E-03, 2.7E-03]                   | 1.000                 | -3.4E-03 [-8.8E-03, 2.0E-03]                       | 0.967                 | -2.2E-03 [-8.1E-03, 3.6E-03]                                                      | 0.999                 |
| Cobalamin intake (µg/d)                    | -5.4E-03 [-9.0E-03, -1.7E-03]                  | 0.053                 | -5.3E-03 [-9.9E-03, -8.1E-04]                      | 0.264                 | -5.6E-03 [-1.1E-02, -6.6E-04]                                                     | 0.285                 |
| Folate intake (µg/d)                       | 4.0E-04 [2.6E-04, 5.5E-04]                     | <0.001                | 4.4E-04 [2.3E-04, 6.5E-04]                         | <0.001                | 5.2E-04 [2.8E-04, 7.6E-04]                                                        | <0.001                |
| Alcohol intake (g/d)                       | -2.9E-04 [-1.7E-03, 1.1E-03]                   | 1.000                 | 1.3E-04 [-1.9E-03, 2.1E-03]                        | 1.000                 | 7.2E-04 [-1.4E-03, 2.8E-03]                                                       | 1.000                 |
| Past/current smoking                       | 1.4E-03 [-4.1E-02, 4.3E-02]                    | 1.000                 | -1.3E-02 [-7.0E-02, 4.3E-02]                       | 1.000                 | 2.4E-02 [-4.1E-02, 8.8E-02]                                                       | 1.000                 |
| Male sex                                   | 5.9E-03 [-7.4E-02, 8.5E-02]                    | 1.000                 | -5.5E-03 [-1.2E-01, 1.1E-01]                       | 1.000                 | -4.7E-02 [-1.7E-01, 7.5E-02]                                                      | 0.999                 |
| Age x serum cobalamin                      | 6.1E-06 [-5.1E-06, 1.7E-05]                    | 0.988                 | -2.1E-05 [-3.8E-05, -3.5E-06]                      | 0.239                 | -3.6E-05 [-5.7E-05, -1.5E-05]                                                     | 0.011                 |
| Age x supplementation                      | 1.9E-03 [-2.0E-03, 5.8E-03]                    | 0.996                 | 7.6E-04 [-5.4E-03, 6.9E-03]                        | 1.000                 |                                                                                   |                       |
| Age x folate intake                        | 1.6E-05 [1.7E-07, 3.1E-05]                     | 0.481                 | 1.8E-05 [-6.5E-06, 4.3E-05]                        | 0.894                 | 2.6E-05 [-3.1E-06, 5.5E-05]                                                       | 0.635                 |
| Age x sex                                  | -7.2E-04 [-4.8E-03, 3.3E-03]                   | 1.000                 | 2.3E-03 [-4.0E-03, 8.6E-03]                        | 1.000                 | -3.4E-03 [-1.1E-02, 4.0E-03]                                                      | 0.996                 |
| Sex x serum cobalamin                      | 2.8E-04 [7.1E-05, 4.9E-04]                     | 0.115                 | 3.9E-04 [1.0E-04, 6.8E-04]                         | 0.106                 | 4.0E-04 [5.5E-05, 7.5E-04]                                                        | 0.253                 |
| Serum creatinine (mg/dL)                   |                                                |                       | 2.3E-01 [1.4E-01, 3.2E-01]                         | <0.001                | 2.5E-01 [1.6E-01, 3.4E-01]                                                        | <0.001                |
| Model fit <sup>c</sup>                     | 0.792                                          |                       | 0.827                                              |                       | 0.834                                                                             |                       |
| Residual standard deviation                | 0.150                                          |                       | 0.147                                              |                       | 0.140                                                                             |                       |
| AIC                                        | -586                                           |                       | -220                                               |                       | -183                                                                              |                       |

## Dynamics and interactions of cobalamin and folate status during advanced aging – a longitudinal study in a community-dwelling cohort with multiple follow-ups

Alexandra Jungert, Carola Zenke-Philippi, Monika Neuhäuser-Berthold – Nutrition Journal

8

*PE* Parameter estimate, *95% CI* 95% confidence interval, *AIC* Akaike's information criterion

<sup>a</sup> Data represent the results of the linear mixed-effects models including logarithmically transformed ( $\log_{10}$ ) serum folate concentrations as dependent variable, random effects of age and subject and centered metric independent variables. Model 2 considered as fixed effects: serum cobalamin, vitamin B/multi-vitamin supplementation, age, absolute fat-free mass, cobalamin intake, folate intake, alcohol intake, smoking, sex and effect modifications by sex and age. Model 3 based on model 2 and considered serum creatinine as additional fixed effect. Model 4 based on model 3 but excluded records, in which use of vitamin B/multi-vitamin supplements was reported.

<sup>b</sup> Denotes *P* values after adjusting for simultaneous inference

<sup>c</sup> Correlation between observed and predicted  $\log_{10}$  serum folate concentrations
